# Supplementary material for: Improving Home Ventilator Alarm Use Among Children Requiring Chronic Mechanical Ventilation
Source: Oxford University Press journal article supplement (doi:10.1542/peds.2021-051968), 2022-05-25
Supplement: peds_2021051968supplementarydata.pdf [file peds_2021051968supplementarydata.pdf]

# Supplemental Information

**SUPPLEMENTAL TABLE 1** All Plan-Do-Study-Act (PDSA) Tests Completed

| Standardizing Clinic Workflow       |                                                                                            |                                                                                                         |                                                                                                       |
|-------------------------------------|--------------------------------------------------------------------------------------------|---------------------------------------------------------------------------------------------------------|-------------------------------------------------------------------------------------------------------|
|                                     | Test                                                                                       | Result                                                                                                  | Action                                                                                                |
| PDSA                                |                                                                                            |                                                                                                         |                                                                                                       |
| PDSA 1–2                            | Compared NM3 and downloaded ventilator data in 1 d and then 1 wk.                          | Downloads had reliable Vte values to dictate alarm use                                                  | Adapted use of ventilator downloads for alarm decisions.                                              |
| PDSA 3–4                            | Attempted to collect downloads early in visit in 1 d and then 1 wk.                        | Better data but less efficient and some patients did not have home vent                                 | Adopted obtaining downloads at start of visit. Adapted to attempt downloads through DME.              |
| PDSA 5–6                            | Attempted obtaining downloads 1 wk in advance through DME with revised contact strategies. | Difficulties obtaining timely, readable downloads in advance.                                           | Abandoned downloads through DME.                                                                      |
| Use of alarm algorithm              |                                                                                            |                                                                                                         |                                                                                                       |
| PDSA 1–2                            | Used algorithm for 1 patient, then 1 d, then 2 wk.                                         | Well received by clinic RTs with multiple additional alarms set.                                        | Adopted use of algorithm.                                                                             |
| PDSA 3                              | Called patients after clinic to assess alarm changes.                                      | 2 alarms reverted back. Calls became very lengthy with topics unrelated to alarms.                      | Acceptable algorithm performance. Abandoned regular calls to assess alarms due to increased workload. |
| Revised algorithm                   |                                                                                            |                                                                                                         |                                                                                                       |
| PDSA 1                              | Apnea alarm simulations.                                                                   | Effective for low tidal volume patients in simulation.                                                  | Adapted trial to inpatients.                                                                          |
| PDSA 2                              | Turned on apnea alarm in 15 patients on the inpatient unit.                                | 9 alarms were turned off by bedside RTs, documentation on rationale was incomplete.                     | Adapted with education of inpatient RTs and improved documentation.                                   |
| PDSA 3                              | Turned on apnea alarm in 15 patients on the inpatient unit.                                | 5 alarms were turned off. Success with patients who had low mandatory breath rate.                      | Adapted algorithm to set apnea alarm for patients with low mandatory breath rates.                    |
| PDSA 4                              | Tried revised algorithm in clinic for 1 wk.                                                | Able to set apnea alarm in a small number of patients.                                                  | Adopted revised algorithm.                                                                            |
| Staff engagement and sustainability |                                                                                            |                                                                                                         |                                                                                                       |
| PDSA 1                              | Add alarm settings to ventilator registry for weekly review.                               | Alarms were added.                                                                                      | Adopted.                                                                                              |
| PDSA 2                              | Reviewed alarms at weekly ventilator meeting.                                              | Attendees were aware of changes, but this information was not disseminated to all physicians and staff. | Adapted and sent alarm info in planning meeting update emails.                                        |
| PDSA 3                              | Sent emails after meeting to all LTMV providers.                                           | Improved knowledge of potential changes and improvement in our measure.                                 | Abandoned after several months once practice was sustained.                                           |

DME, durable medical equipment; LTMV, long-term medical ventilator.
